# Supplementary material for: Comprehensive Insight from Phthalates Occurrence: From Health Outcomes to Emerging Analytical Approaches
Source: MDPI journal article supplement (doi:10.3390/toxics9070157), 2021-07-01
Supplement: s1 [file s1]

*Review*

# Comprehensive Insight from Phthalates Occurrence: From Health Outcomes to Emerging Analytical Approaches

Catarina Luís, Manuel Algarra, José S. Câmara and Rosa Perestrelo

**List of abbreviations:**

ACET—acetone  
ASE—Accelerated solvent extraction  
BBP—butyl benzyl phthalate  
BEHP—bis(2-ethylhexyl) phthalate  
BHT—2,6-di-ter-butyl-4-methyl phenol  
BMPP—bis(4-methyl-2-pentyl) phthalate  
BzBP—benzyl butyl phthalate  
C<sub>2</sub>Cl<sub>4</sub>—tetrachloroethylene  
DAP—diamyl phthalate  
DBEP—bis(2-n-butoxyethyl) phthalate  
DBP—dibutyl phthalate  
DCHP—dicyclohexyl phthalate  
DCM—dichloromethane  
DDP—diphenyl phthalate  
DEEP—bis(2-ethoxyethyl) phthalate  
DEHP—di(2-ethylhexyl) phthalate  
DEP—di(2-ethylhexyl) phthalate  
DES—deep eutectic solvent  
DHXP—dihexyl phthalate  
DIBP—di-isobutyl phthalate  
DiDP—di-isodecyl phthalate  
DiHP—di-isoheptyl phthalate  
DiNP—di-isononyl phthalate  
DiPrP—di-isopropyl phthalate  
DLLME—dispersive liquid-liquid microextraction  
DMEP—di(methoxyethyl) phthalate  
DMP—dimethyl phthalate  
DnOP—di-n-octyl phthalate  
DNP—dinonyl phthalate  
DnPP—di-n-pentyl phthalate  
DnPrP—di-n-propyl phthalate  
DOP—dioctyl phthalate  
DPeP—dipentyl phthalate  
DPhP—diphenyl phthalate

DPP—di-n-amyl phthalate  
EFSA—European Food Safety Agency  
EPA—Environmental Protection Agency  
Et<sub>2</sub>O—diethyl ether  
EtAc—ethyl acetate  
GC-FID—gas chromatography with flame ionization detection  
GC-MS—gas chromatography-mass spectrometry  
GC-MS/MS—gas chromatography tandem mass spectrometry  
GP-MSE—gas purge microsyringe extraction  
HEX—hexane  
HF-SPME—hollow fiber-solid phase microextraction  
HMW—higher-molecular weight  
HPLC-UV—liquid chromatography with ultraviolet detection  
IT-SPME—in-tube solid-phase microextraction  
LC-DAD-MS/MS—liquid chromatography coupled to diode array detection tandem mass spectrometry;  
LC-HRMS—liquid chromatography-high resolution mass spectrometry  
LC-MS/MS—liquid chromatography with tandem mass spectrometry  
LLE—liquid-liquid extraction  
LMW—lower-molecular weight  
LOD—limit of detection  
LOQ—limit of quantification  
m-μ-dSPE- magnetic-micro-dispersive solid phase extraction  
MBP—monobutyl phthalate  
MBzP—monobenzyl phthalate  
MeCN—acetonitrile  
MEHP—mono(2-ethylhexyl)phthalate  
MeOH—methanol  
MEP—monoethyl phthalate  
MgSO<sub>4</sub>—sulphate magnesium  
MMP—monomethyl phthalate  
MOP—monooctyl phthalate  
MRM—multiple reaction monitoring  
MSPD—matrix solid phase dispersion  
MSPE—magnetic solid phase extraction  
NaCl—sodium chloride  
PAEs—phthalate esters  
PDMS/DVB—polydimethylsiloxane/divinylbenzene  
PENT—pentane  
PET—polyethylene terephthalate  
PSA—primary secondary amine  
PTFE—polytetrafluoroethylene  
PVC—polyvinyl chloride

QuEChERS-dSPE—quick, easy, cheap, effective, rugged, and safe—dispersive solid phase extraction

RSD—relative standard deviation

SCDE—sodium citrate dibasic sesquihydrate

SCTD—sodium citrate tribasic dihydrate

SPE—solid phase extraction

SPM—suspended particulate matter

SPM—suspended particulate matter

SPME—solid phase extraction

TDI—total daily intakes

TOL—toluene

UA-D-SPE—ultrasound-assisted dispersive-solid phase extraction

UAE—ultrasound assisted extraction

UHPLC-MS/MS—ultra-high performance liquid chromatography-MS/MS

UPLC-TOF-MS—ultra-performance liquid chromatography coupled time-of-flight mass spectrometry

UVA-DLLME—ultrasound vortex assisted dispersive liquid–liquid microextraction

VA-EDLLME—vortex assisted-emulsification dispersive liquid-liquid microextraction

VSLME—vortex-assisted surfactant-enhanced emulsification liquid–liquid microextraction
